# Supplementary material
Source: PubMed Central journal article supplement (PMC5040677)
Supplement: ajtr0008-3791-f7.pdf [file ajtr0008-3791-f7.pdf]

## A mixture of apple pomace and rosemary extract improves IR in rats

**Supplementary Table 1.** Intakes of fructose and chow, body weight, fat mass, and the weight, TC and TG of liver in rats

| Parameter                      | Group              |                       |                         |                         |
|--------------------------------|--------------------|-----------------------|-------------------------|-------------------------|
|                                | Water AR 0 (mg/kg) | Fructose AR 0 (mg/kg) | Fructose AR 100 (mg/kg) | Fructose AR (500 mg/kg) |
| Fructose intake (g/5 w/3 rats) | -                  | 1152±36               | 1133±35                 | 1183±37                 |
| Chow intake (g/5 w/3 rats)     | 2463±51*           | 1372±52               | 1455±52                 | 1596±53*                |
| Body weight (g)                | 383.6±12.7         | 389.9±18.3            | 385.4±17.6              | 401.4±17.6              |
| e+p FAT weight (g)             | 7.696±0.738*       | 12.368±1.025          | 12.039±1.297            | 14.358±1.548            |
| Liver weight (g)               | 9.305±0.426        | 9.526±0.375           | 9.781±0.397             | 10.242±0.502            |
| Liver TC (μmol/g)              | 5.6±0.7*           | 8.5±1.2               | 8.5±0.6                 | 9.3±0.4                 |
| Liver TG (μmol/g)              | 48.2±5.5*          | 113.3±15.3            | 91.5±14.4               | 88.1±10.7               |

e+p FAT: epididymal + perirenal fat; TC, total cholesterol; TG, triglyceride. vs fructose AR 0 mg/kg, \*P<0.05.

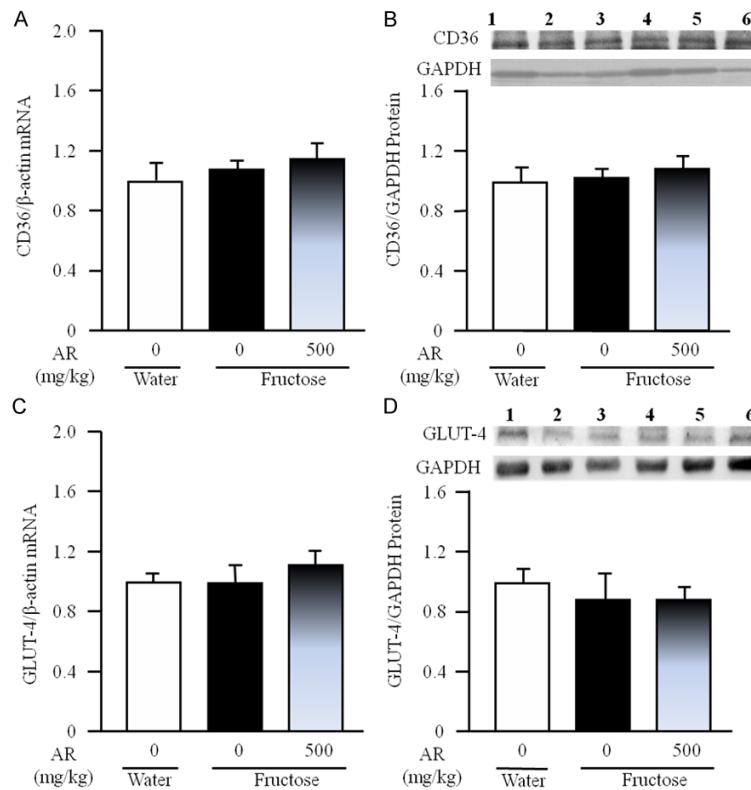

**Supplementary Figure 1.** Expression of CD36 (A) and GLUT-4 (C) mRNAs and CD36 (B) and GLUT-4 (D) proteins (Lanes 1 & 2, water control; Lanes 3 & 4, fructose control; Lanes 5 & 6, fructose AR (500 mg/kg) in the gastrocnemius of rats. The fructose controls (AR 0 mg/kg) and fructose AR (500 mg/kg) groups had free access to 10% fructose in their drinking water over 13 weeks. The water controls (AR 0 mg/kg) had free access to a tap water. AR was administered by gavage daily during the last 5 weeks. The water and fructose controls received vehicle (5% Gum Arabic) alone. mRNA was determined by Real-time PCR and normalized to β-actin, while protein expression was analyzed by Western blot and normalized to GAPDH. Expression in water control was arbitrarily assigned a value of 1. Data are means ± SEM (n=6-9 each group).
